# Supplementary material for: Comparison of 3D and 4D Monte Carlo optimization in robotic tracking stereotactic body radiotherapy of lung cancer
Source: PubMed Central journal article supplement (PMC9205812; doi:10.1007/s00066-014-0747-5), 2014-09-20
Supplement: 66_2014_747_MOESM1_ESM.pdf [file 66_2014_747_MOESM1_ESM.pdf]

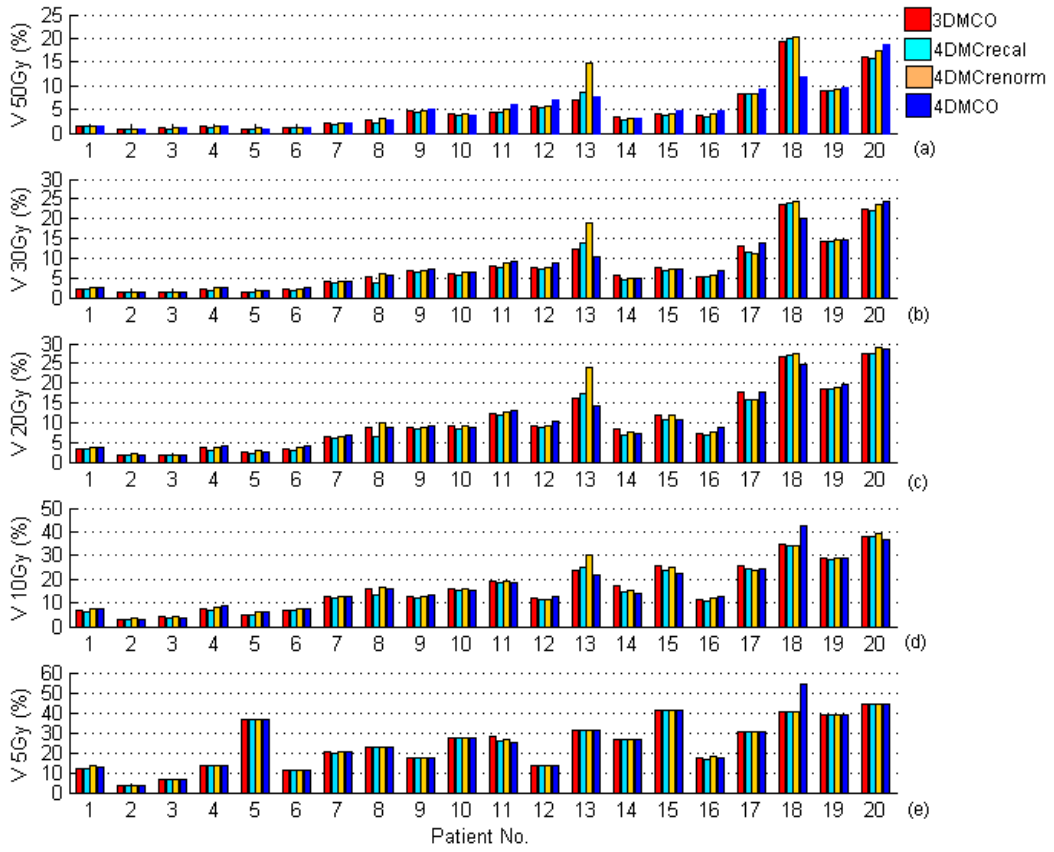

Fig. S1 Bar plot showing the percent normal lung volume receiving (a) 50 Gy, (b) 30 Gy, (c) 20 Gy, (d) 10 Gy, and (e) 5 Gy in the 3DMCO, 4DMC<sub>recal</sub>, 4DMC<sub>renorm</sub>, and 4DMCO plans in 20 patients ordered in increasing GTV size.
